# Supplementary material for: Successful Treatment of HIV-Associated Kaposi Sarcoma with Immune Checkpoint Blockade
Source: Oxford University Press journal article supplement (doi:10.1158/2326-6066.cir-18-0121), 2018-09-07
Supplement: 23266066cir180121-sup-197815_2_supp_4879394_pblb5t.docx [file 23266066cir180121-sup-197815_2_supp_4879394_pblb5t.docx]

**Supplemental Figure Legend:**

Supplemental Figure 1**:** CONSORT diagram

**Supplemental Figure 1**: CONSORT diagram

Abbreviations: CPB = checkpoint blockade; HIV = human immunodeficiency virus
